# Supplementary material for: New Insights on the Zeugodacus cucurbitae (Coquillett) Bacteriome
Source: PubMed Central journal article supplement (PMC8004655; doi:10.3390/microorganisms9030659), 2021-03-22
Supplement: microorganisms-09-00659-s001.pdf [file microorganisms-09-00659-s001.pdf]

## Supplementary File

**Supplementary Table S1:** Number of reads and the relative abundance of each OTU in the three tested populations

| #OTU   | Genus                            | Number of reads |          |         | Relative abundance |          |         |
|--------|----------------------------------|-----------------|----------|---------|--------------------|----------|---------|
|        |                                  | Dinajpur        | Rajshahi | Jessore | Dinajpur           | Rajshahi | Jessore |
| Otu1   | <i>Dysgonomonas</i>              | 350132          | 196943   | 180832  | 0.3667             | 0.2046   | 0.1896  |
| Otu10  | <i>Candidatus Schmidhempelia</i> | 11283           | 10284    | 14942   | 0.0118             | 0.0107   | 0.0157  |
| Otu104 | <i>Klebsiella</i>                | 2467            | 1691     | 1371    | 0.0026             | 0.0018   | 0.0014  |
| Otu11  | <i>Pectobacterium</i>            | 2658            | 9798     | 17903   | 0.0028             | 0.0102   | 0.0188  |
| Otu119 | <i>Orbus</i>                     | 760             | 2252     | 1457    | 0.0008             | 0.0023   | 0.0015  |
| Otu12  | <i>Chishuiella</i>               | 7872            | 9357     | 13924   | 0.0082             | 0.0097   | 0.0146  |
| Otu123 | <i>Enterobacter</i>              | 3599            | 680      | 503     | 0.0038             | 0.0007   | 0.0005  |
| Otu13  | uncultured Orbaceae              | 0               | 0        | 26511   | 0.0000             | 0.0000   | 0.0278  |
| Otu14  | <i>Orbus</i>                     | 7578            | 17776    | 12366   | 0.0079             | 0.0185   | 0.0130  |
| Otu15  | <i>Dysgonomonas</i>              | 960             | 13710    | 1169    | 0.0010             | 0.0142   | 0.0012  |
| Otu16  | <i>Pectobacterium</i>            | 1898            | 8014     | 5608    | 0.0020             | 0.0083   | 0.0059  |
| Otu17  | <i>Gilliamella</i>               | 227             | 4232     | 914     | 0.0002             | 0.0044   | 0.0010  |
| Otu18  | <i>Carnimonas</i>                | 0               | 346      | 4351    | 0.0000             | 0.0004   | 0.0046  |
| Otu19  | <i>Morganella</i>                | 238             | 4873     | 502     | 0.0002             | 0.0051   | 0.0005  |
| Otu2   | <i>Orbus</i>                     | 86950           | 100386   | 151112  | 0.0911             | 0.1043   | 0.1584  |
| Otu20  | <i>Pectobacterium</i>            | 4610            | 2458     | 3712    | 0.0048             | 0.0026   | 0.0039  |
| Otu200 | <i>Candidatus Schmidhempelia</i> | 2147            | 719      | 1617    | 0.0022             | 0.0007   | 0.0017  |
| Otu21  | <i>Desulfovibrio</i>             | 1216            | 1099     | 1047    | 0.0013             | 0.0011   | 0.0011  |
| Otu22  | <i>Dysgonomonas</i>              | 320             | 1737     | 1113    | 0.0003             | 0.0018   | 0.0012  |
| Otu23  | <i>Lactococcus</i>               | 3661            | 0        | 0       | 0.0038             | 0.0000   | 0.0000  |
| Otu26  | <i>Orbus</i>                     | 4143            | 16988    | 14840   | 0.0043             | 0.0176   | 0.0156  |
| Otu280 | <i>Klebsiella</i>                | 2612            | 801      | 2703    | 0.0027             | 0.0008   | 0.0028  |
| Otu281 | <i>Klebsiella</i>                | 2380            | 499      | 699     | 0.0025             | 0.0005   | 0.0007  |
| Otu29  | <i>Citrobacter</i>               | 23809           | 29274    | 22734   | 0.0249             | 0.0304   | 0.0238  |
| Otu3   | <i>Vagococcus</i>                | 87985           | 78421    | 25611   | 0.0921             | 0.0815   | 0.0269  |
| Otu302 | <i>Empedobacter</i>              | 1760            | 782      | 649     | 0.0018             | 0.0008   | 0.0007  |
| Otu319 | <i>Escherichia</i>               | 1121            | 743      | 1272    | 0.0012             | 0.0008   | 0.0013  |
| Otu320 | <i>Citrobacter</i>               | 2423            | 1598     | 1077    | 0.0025             | 0.0017   | 0.0011  |

|        |                                   |        |         |        |        |        |        |
|--------|-----------------------------------|--------|---------|--------|--------|--------|--------|
| Otu33  | <i>Enterobacter</i>               | 11201  | 18300   | 12627  | 0.0117 | 0.0190 | 0.0132 |
| Otu379 | <i>Enterobacter</i>               | 2518   | 1077    | 7447   | 0.0026 | 0.0011 | 0.0078 |
| Otu4   | Enterobacteriaceae;Ambiguous_taxa | 92609  | 149446  | 115852 | 0.0970 | 0.1552 | 0.1215 |
| Otu40  | <i>Orbus</i>                      | 3701   | 3544    | 4810   | 0.0039 | 0.0037 | 0.0050 |
| Otu45  | <i>Klebsiella</i>                 | 2047   | 422     | 1223   | 0.0021 | 0.0004 | 0.0013 |
| Otu47  | <i>Klebsiella</i>                 | 4484   | 8769    | 9433   | 0.0047 | 0.0091 | 0.0099 |
| Otu488 | <i>Klebsiella</i>                 | 1051   | 1081    | 1804   | 0.0011 | 0.0011 | 0.0019 |
| Otu49  | <i>Desulfovibrio</i>              | 279    | 1464    | 2658   | 0.0003 | 0.0015 | 0.0028 |
| Otu5   | <i>Providencia</i>                | 67508  | 31351   | 17249  | 0.0707 | 0.0326 | 0.0181 |
| Otu52  | <i>Shimwellia</i>                 | 1333   | 946     | 1304   | 0.0014 | 0.0010 | 0.0014 |
| Otu53  | <i>Orbus</i>                      | 3155   | 1089    | 1647   | 0.0033 | 0.0011 | 0.0017 |
| Otu59  | <i>Desulfovibrio</i>              | 61     | 4471    | 7183   | 0.0001 | 0.0046 | 0.0075 |
| Otu6   | <i>Desulfovibrio</i>              | 902    | 19174   | 45848  | 0.0009 | 0.0199 | 0.0481 |
| Otu7   | <i>Citrobacter</i>                | 58784  | 122492  | 153589 | 0.0616 | 0.1272 | 0.1610 |
| Otu70  | <i>Klebsiella</i>                 | 21603  | 18064   | 32968  | 0.0226 | 0.0188 | 0.0346 |
| Otu72  | <i>Klebsiella</i>                 | 5830   | 18748   | 9983   | 0.0061 | 0.0195 | 0.0105 |
| Otu8   | <i>Orbus</i>                      | 58612  | 14849   | 10526  | 0.0614 | 0.0154 | 0.0110 |
| Otu9   | <i>Dysgonomonas</i>               | 2034   | 30924   | 5498   | 0.0021 | 0.0321 | 0.0058 |
| Otu97  | <i>Empedobacter</i>               | 2365   | 1134    | 1612   | 0.0025 | 0.0012 | 0.0017 |
|        |                                   |        |         |        |        |        |        |
|        | <b>Sum per area</b>               | 954886 | 962806  | 953800 |        |        |        |
|        | <b>Total Reads</b>                |        | 2871492 |        |        |        |        |

**Supplementary Table S2:** Nineteen OTUs remained unassigned and were classified at lower similarities. These unassigned OTUs could potentially belong to new uncharacterized taxa. The column titled “Taxonomy assigned at” contains the % similarity threshold that each sequence was classified during taxonomy assignment.

| OTU   | Identified as                                        | Taxonomy assigned at       |
|-------|------------------------------------------------------|----------------------------|
| Otu1  | Dysgonomonadaceae;<br><i>Dysgonomonas</i>            | 90 (potential new genus)   |
| Otu10 | Orbaceae; <i>Candidatus</i><br><i>Schmidhempelia</i> | 94 (potential new species) |
| Otu14 | Orbaceae; <i>Orbus</i>                               | 94 (potential new species) |
| Otu15 | Dysgonomonadaceae;<br><i>Dysgonomonas</i>            | 94 (potential new species) |
| Otu18 | Halomonadaceae; <i>Carnimonas</i>                    | 94 (potential new species) |
| Otu21 | Desulfovibrionaceae;<br><i>Desulfovibrio</i>         | 90 (potential new genus)   |
| Otu22 | Dysgonomonadaceae;<br><i>Dysgonomonas</i>            | 94 (potential new species) |
| Otu40 | Orbaceae; <i>Orbus</i>                               | 94 (potential new species) |
| Otu49 | Desulfovibrionaceae;<br><i>Desulfovibrio</i>         | 90 (potential new genus)   |
| Otu52 | Enterobacteriaceae; <i>Shimwellia</i>                | 94 (potential new species) |

---

|        |                                                      |                            |
|--------|------------------------------------------------------|----------------------------|
| Otu53  | Orbaceae; <i>Orbus</i>                               | 94 (potential new species) |
| Otu59  | Desulfovibrionaceae;<br><i>Desulfovibrio</i>         | 94 (potential new species) |
| Otu97  | Weeksellaceae; <i>Empedobacter</i> ;                 | 81 (potential new family)  |
| Otu119 | Orbaceae; <i>Orbus</i>                               | 90 (potential new genus)   |
| Otu123 | Enterobacteriaceae;<br><i>Enterobacter</i>           | 90 (potential new genus)   |
| Otu200 | Orbaceae; <i>Candidatus</i><br><i>Schmidhempelia</i> | 94 (potential new species) |
| Otu302 | Weeksellaceae; <i>Empedobacter</i>                   | 81 (potential new family)  |
| Otu319 | Enterobacteriaceae;<br><i>Escherichia-Shigella</i>   | 94 (potential new species) |
| Otu488 | Enterobacteriaceae; <i>Klebsiella</i>                | 94 (potential new species) |

---

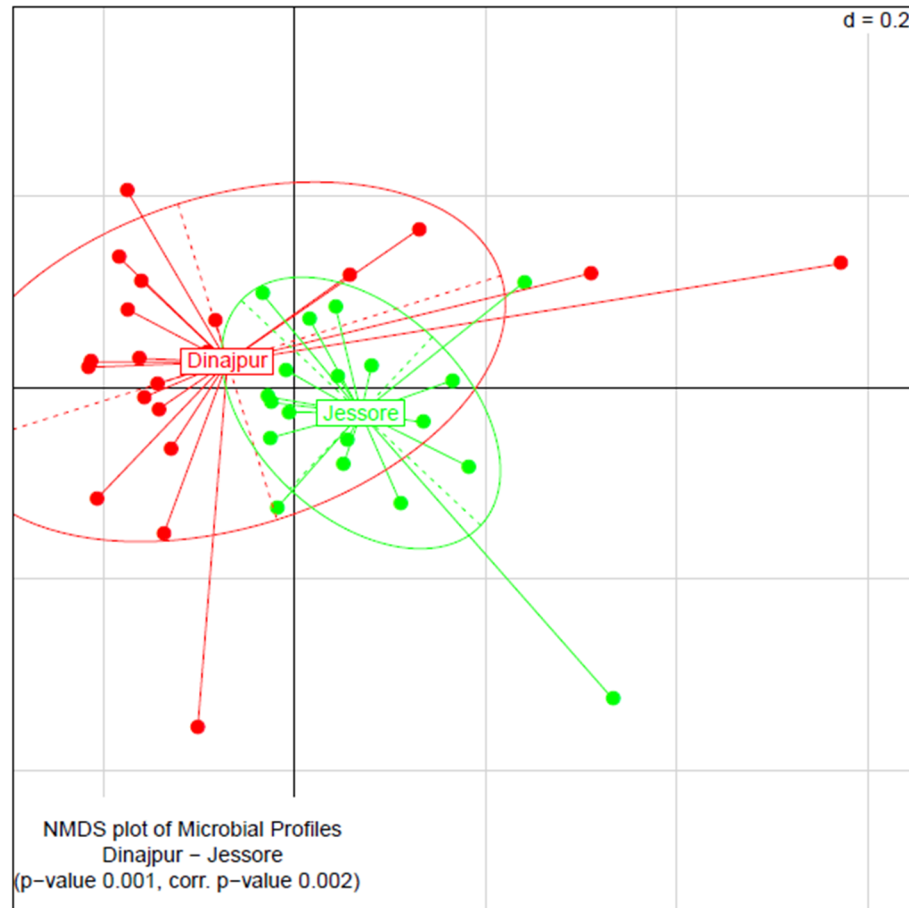

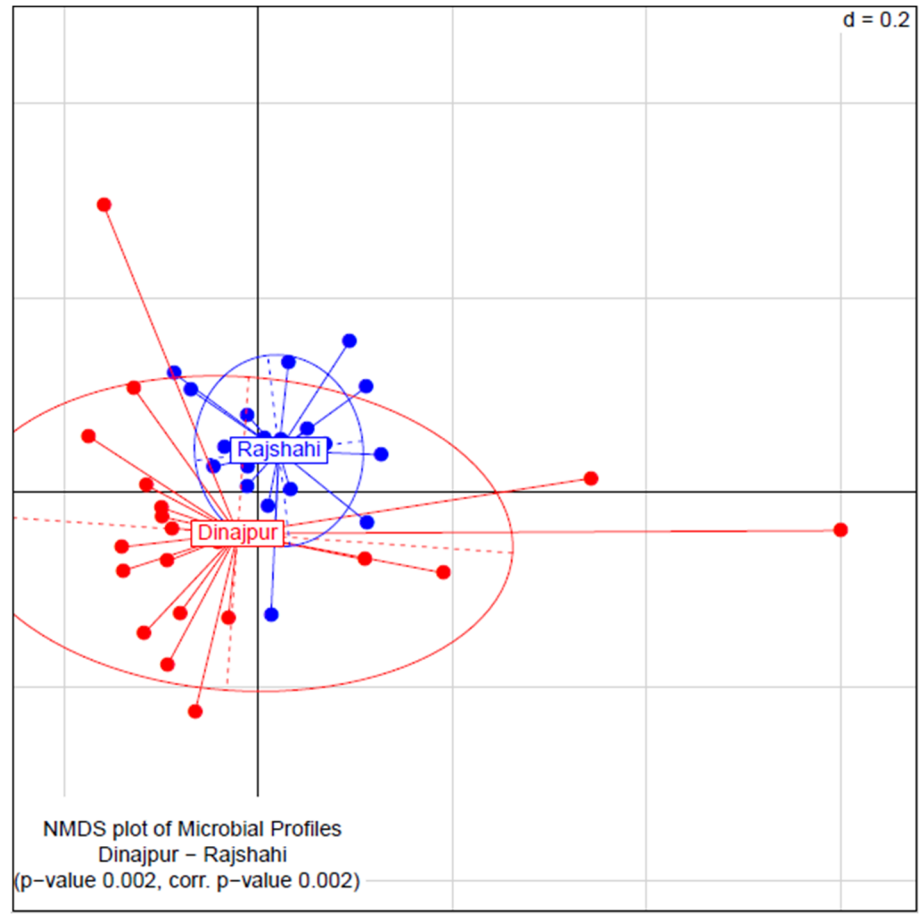

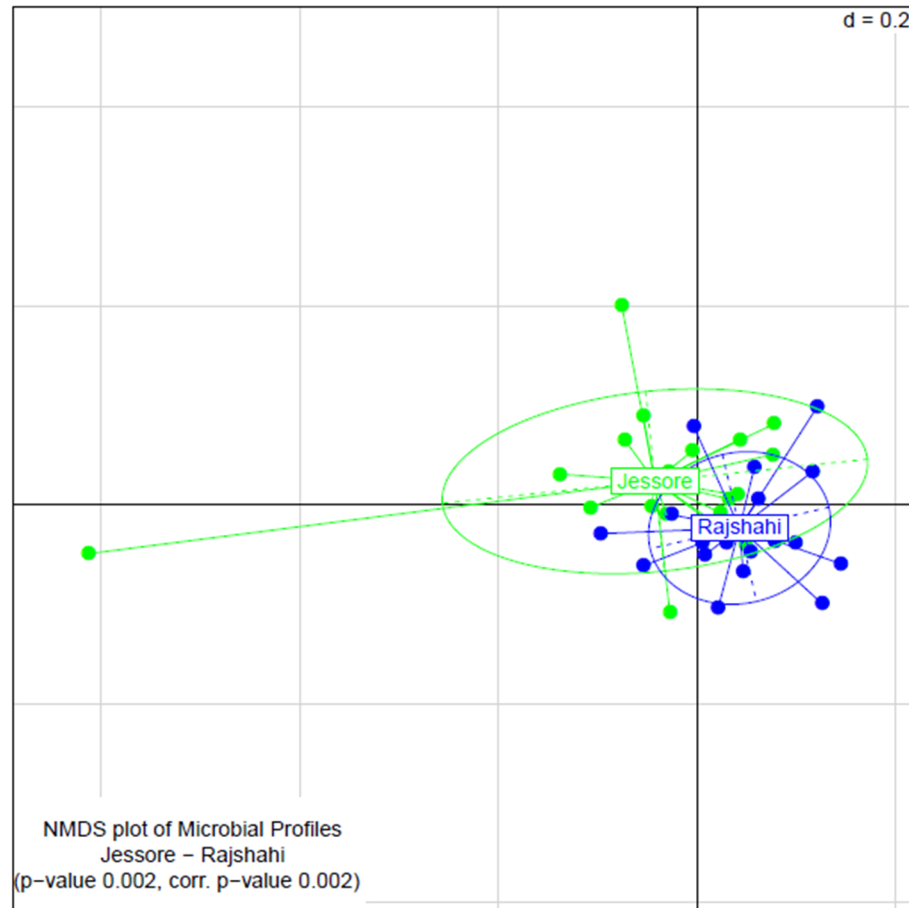

**Supplementary Figure S1:** Pairwise non-metric multidimensional scaling (NMDS) plot of bacterial communities for *Z. cucurbitae* samples collected from Dinajpur (red), Jessore (green) and Rajshahi (blue). All p-values are below 0.05 indicating statistically significant differences. 'd' indicates dissimilarity scale of the grid (d=0.2 mean that the distance between two grid lines represents approximately 20% dissimilarity between the samples).

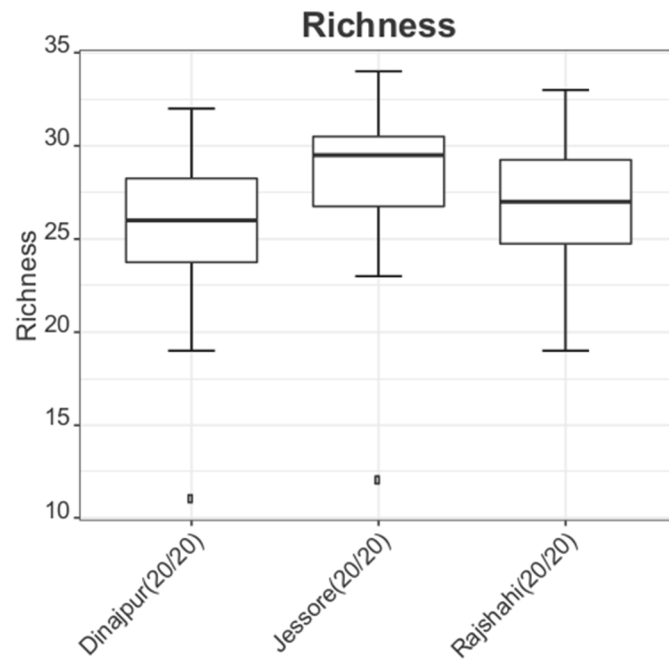

Kruskal-Wallis Rank Sum Test – all groups

|          | p-value | Adj. p-value |
|----------|---------|--------------|
| Richness | 0.0487  | 0.138        |

Wilcoxon Rank Sum Test – pairwise

| Groups | p-value | Adj. p-value |
|--------|---------|--------------|
| 1-2    | 0.0166  | 0.0498       |

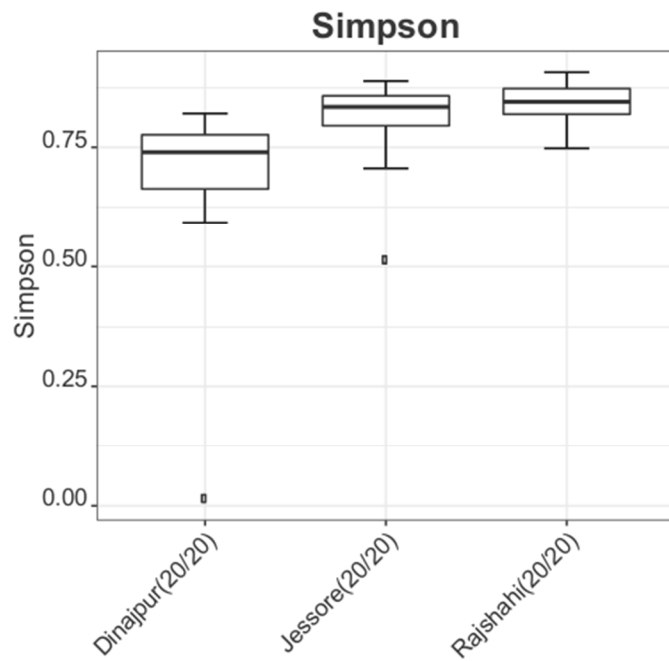

Kruskal-Wallis Rank Sum Test – all groups

|         | p-value | Adj. p-value |
|---------|---------|--------------|
| Simpson | 0       | 0            |

Wilcoxon Rank Sum Test – pairwise

| Groups | p-value | Adj. p-value |
|--------|---------|--------------|
| 1-2    | 0       | 0            |
| 1-3    | 0       | 0            |



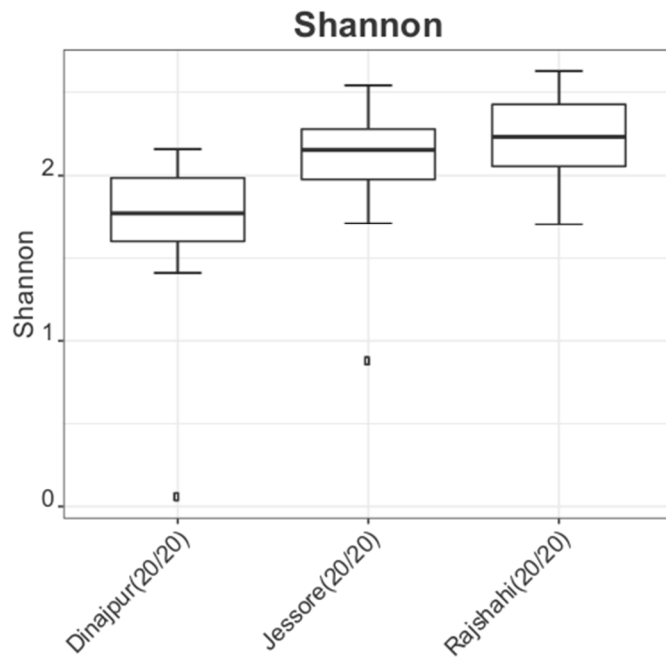

Kruskal-Wallis Rank Sum Test - all groups

|         | p-value | Adj. p-value |
|---------|---------|--------------|
| Shannon | 0       | 0            |

Wilcoxon Rank Sum Test - pairwise

| Groups | p-value | Adj. p-value |
|--------|---------|--------------|
| 1-2    | 2e-04   | 3e-04        |
| 1-3    | 0e+00   | 0e+00        |

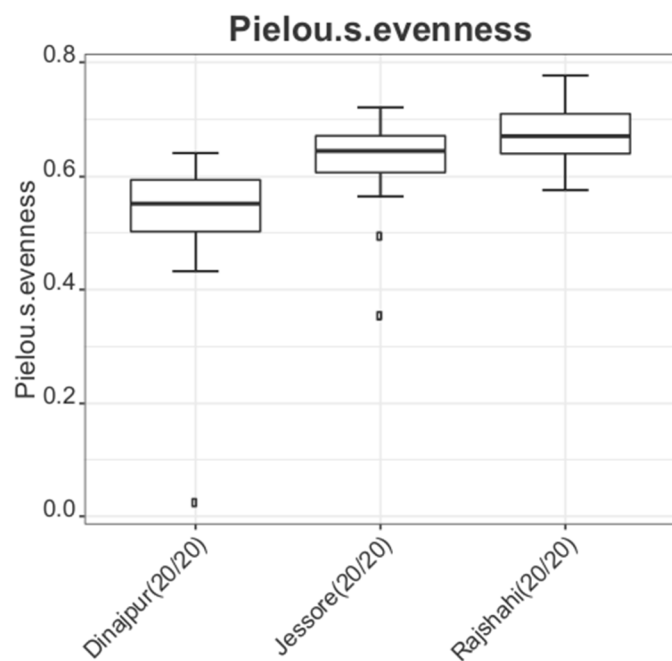

Kruskal-Wallis Rank Sum Test - all groups

|                   | p-value | Adj. p-value |
|-------------------|---------|--------------|
| Pielou.s.evenness | 0       | 0            |

Wilcoxon Rank Sum Test - pairwise

| Groups | p-value | Adj. p-value |
|--------|---------|--------------|
| 1-2    | 0.0001  | 0.0002       |
| 1-3    | 0.0000  | 0.0000       |
| 2-3    | 0.0491  | 0.0491       |

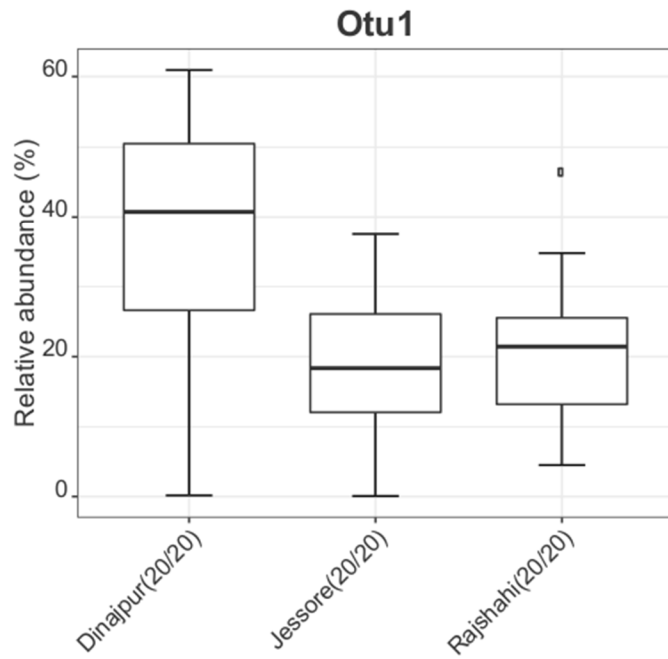

Kruskal-Wallis Rank Sum Test - all group

|      | p-value | Adj. p-value |
|------|---------|--------------|
| Otu1 | 0.0011  | 0.0094       |

Wilcoxon Rank Sum Test - pairwise

| Groups | p-value | Adj. p-value |
|--------|---------|--------------|
| 1-2    | 6e-04   | 0.0018       |
| 1-3    | 2e-03   | 0.0030       |

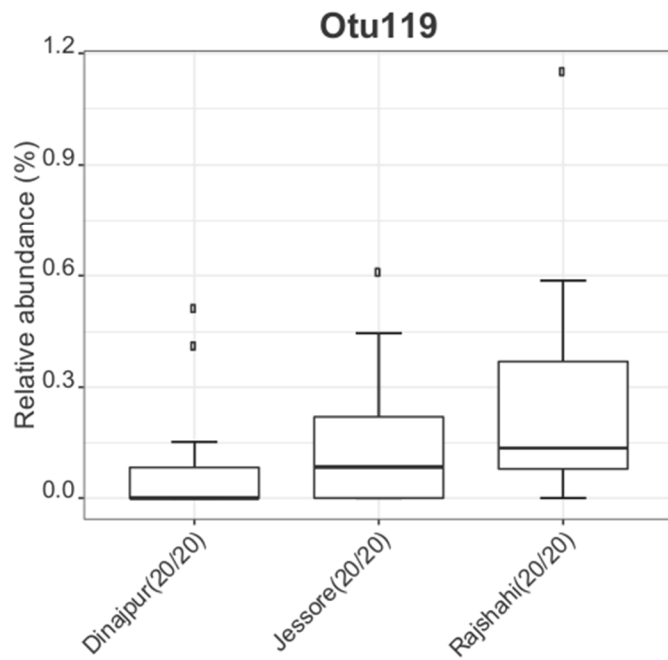

Kruskal-Wallis Rank Sum Test - all groups

|        | p-value | Adj. p-value |
|--------|---------|--------------|
| Otu119 | 0.0283  | 0.0902       |

Wilcoxon Rank Sum Test - pairwise

| Groups | p-value | Adj. p-value |
|--------|---------|--------------|
| 1-3    | 0.0086  | 0.0258       |

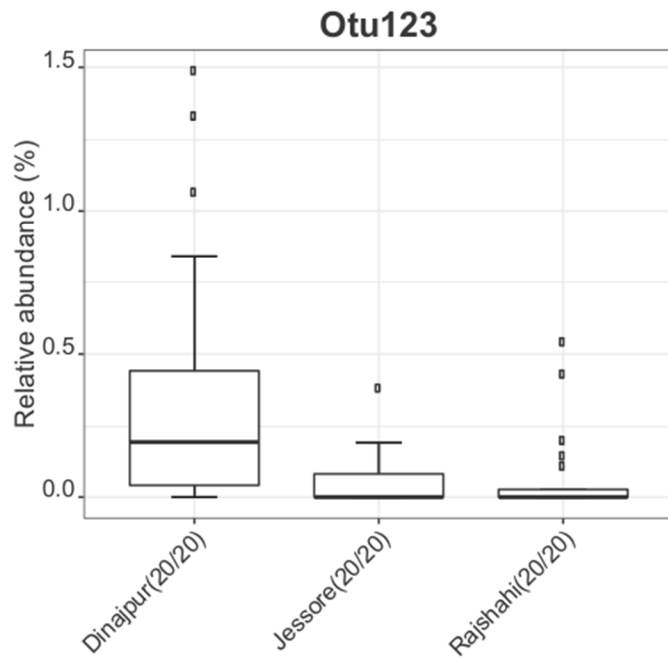

Kruskal-Wallis Rank Sum Test - all groups

|        | p-value | Adj. p-value |
|--------|---------|--------------|
| Otu123 | 6e-04   | 0.0061       |

Wilcoxon Rank Sum Test - pairwise

| Groups | p-value | Adj. p-value |
|--------|---------|--------------|
| 1-2    | 0.001   | 0.003        |
| 1-3    | 0.002   | 0.003        |

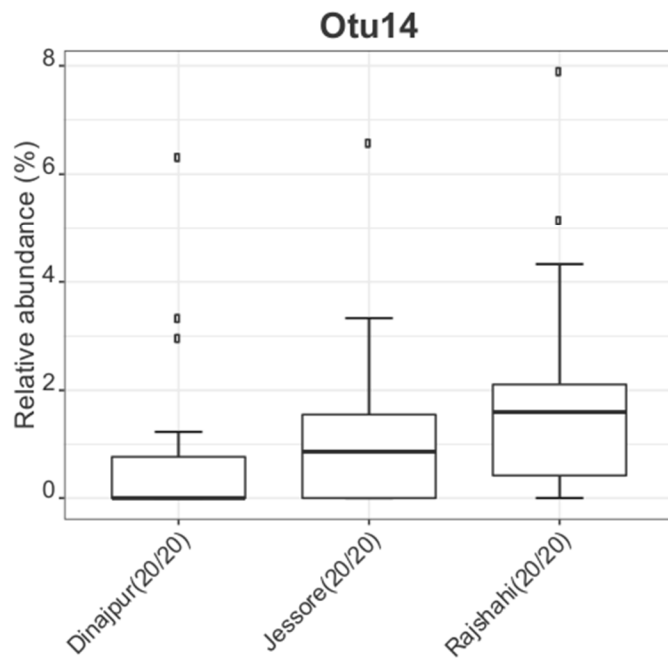

Kruskal-Wallis Rank Sum Test - all groups

|       | p-value | Adj. p-value |
|-------|---------|--------------|
| Otu14 | 0.0261  | 0.0902       |

Wilcoxon Rank Sum Test - pairwise

| Groups | p-value | Adj. p-value |
|--------|---------|--------------|
| 1-3    | 0.0107  | 0.0321       |

### Otu15

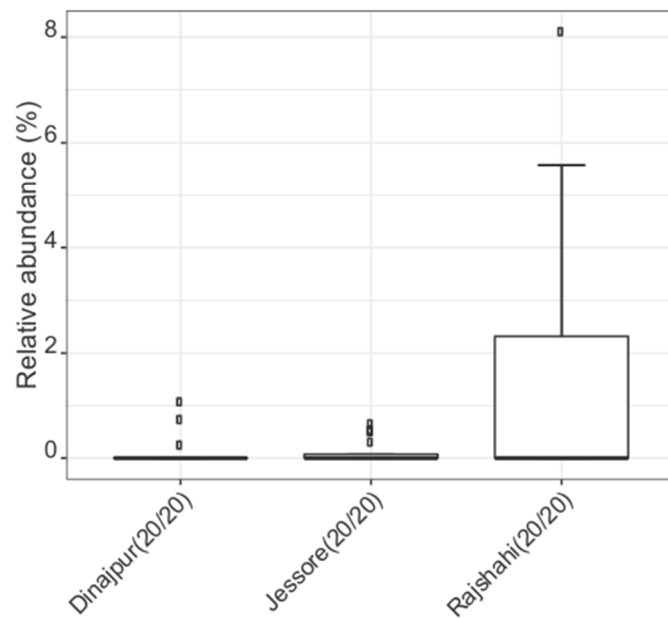

Kruskal-Wallis Rank Sum Test - all groups

|       | p-value | Adj. p-value |
|-------|---------|--------------|
| Otu15 | 0.034   | 0.102        |

Wilcoxon Rank Sum Test - pairwise

| Groups | p-value | Adj. p-value |
|--------|---------|--------------|
| 1-3    | 0.0195  | 0.0585       |

### Otu17

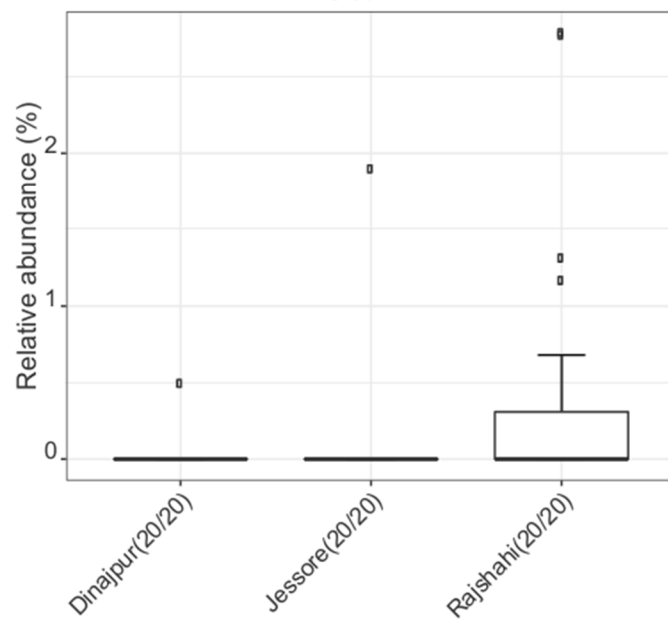

Kruskal-Wallis Rank Sum Test - all groups

|       | p-value | Adj. p-value |
|-------|---------|--------------|
| Otu17 | 0.0275  | 0.0902       |

Wilcoxon Rank Sum Test - pairwise

| Groups | p-value | Adj. p-value |
|--------|---------|--------------|
| 1-3    | 0.0354  | 0.0714       |
| 2-3    | 0.0476  | 0.0714       |

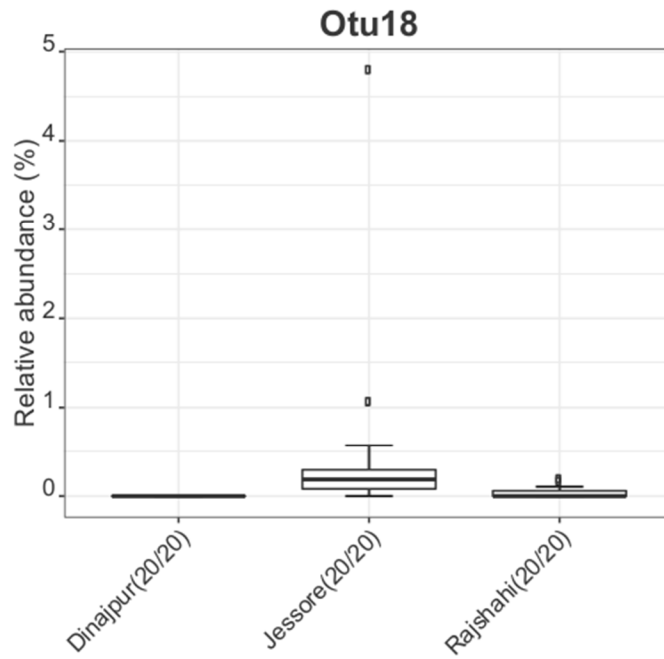

Kruskal-Wallis Rank Sum Test - all groups

|       | p-value | Adj. p-value |
|-------|---------|--------------|
| Otu18 | 0       | 0            |

Wilcoxon Rank Sum Test - pairwise

| Groups | p-value | Adj. p-value |
|--------|---------|--------------|
| 1-2    | 0.0000  | 0.0000       |
| 1-3    | 0.0045  | 0.0045       |
| 2-3    | 0.0001  | 0.0002       |

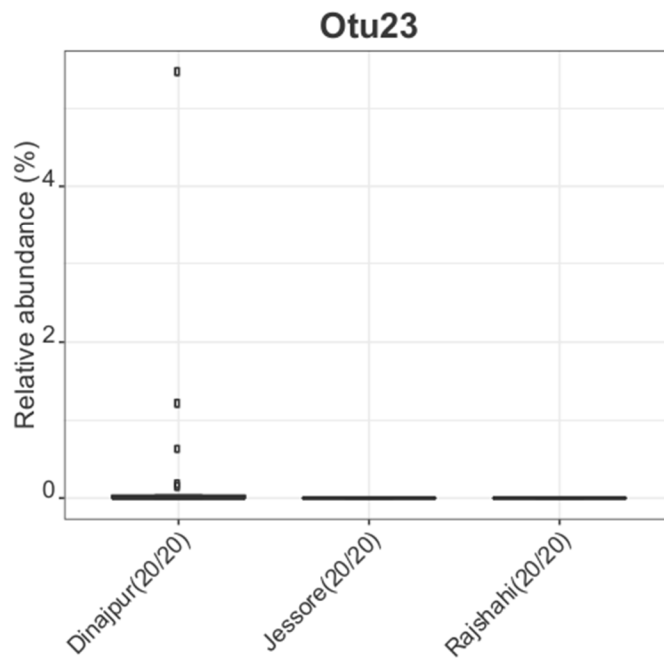

Kruskal-Wallis Rank Sum Test - all groups

|       | p-value | Adj. p-value |
|-------|---------|--------------|
| Otu23 | 0.0047  | 0.024        |

Wilcoxon Rank Sum Test - pairwise

| Groups | p-value | Adj. p-value |
|--------|---------|--------------|
| 1-2    | 0.0198  | 0.0198       |
| 1-3    | 0.0198  | 0.0198       |

### Otu3

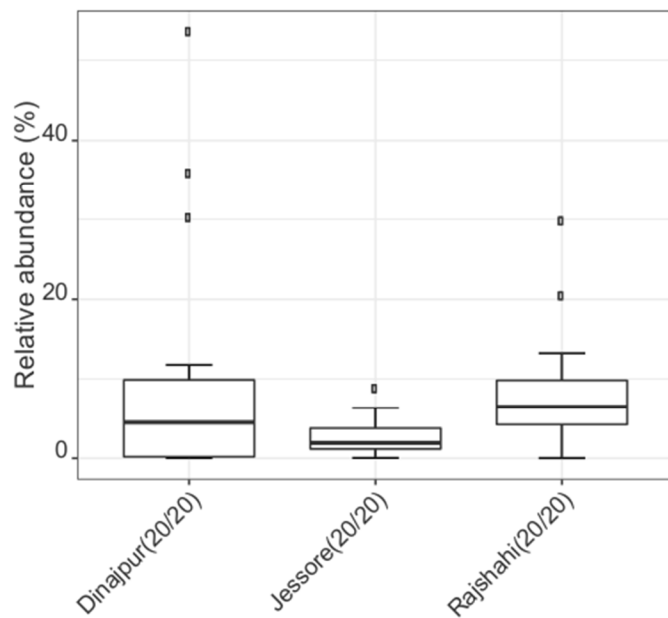

ruskal-Wallis Rank Sum Test - all group

|      | p-value | Adj. p-value |
|------|---------|--------------|
| Otu3 | 0.0179  | 0.0702       |

Wilcoxon Rank Sum Test - pairwise

| Groups | p-value | Adj. p-value |
|--------|---------|--------------|
| 2-3    | 4e-04   | 0.0012       |

### Otu4

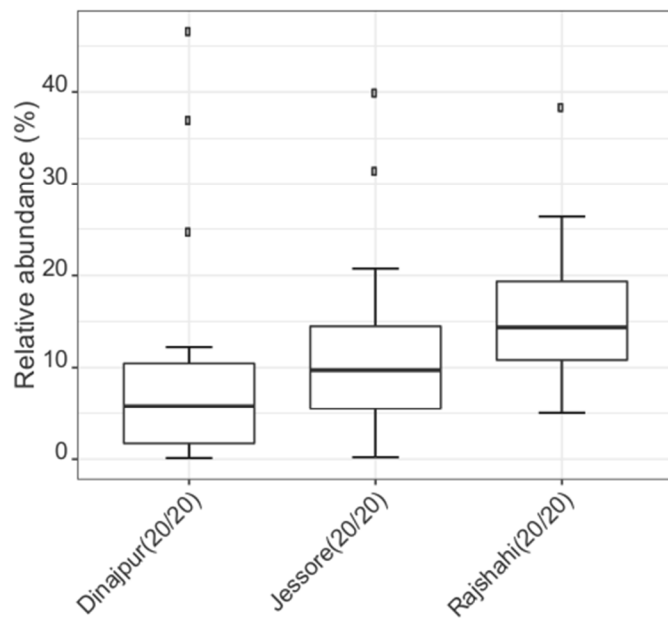

ruskal-Wallis Rank Sum Test - all group

|      | p-value | Adj. p-value |
|------|---------|--------------|
| Otu4 | 0.0032  | 0.0204       |

Wilcoxon Rank Sum Test - pairwise

| Groups | p-value | Adj. p-value |
|--------|---------|--------------|
| 1-3    | 0.0009  | 0.0027       |
| 2-3    | 0.0402  | 0.0603       |

### Otu45

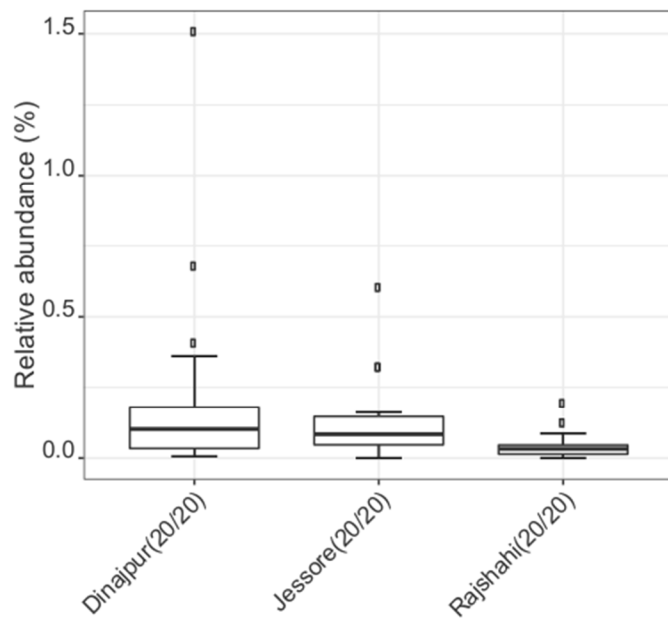

Kruskal-Wallis Rank Sum Test - all groups

|       | p-value | Adj. p-value |
|-------|---------|--------------|
| Otu45 | 0.0082  | 0.038        |

Wilcoxon Rank Sum Test - pairwise

| Groups | p-value | Adj. p-value |
|--------|---------|--------------|
| 1-3    | 0.0095  | 0.0142       |
| 2-3    | 0.0058  | 0.0142       |

### Otu59

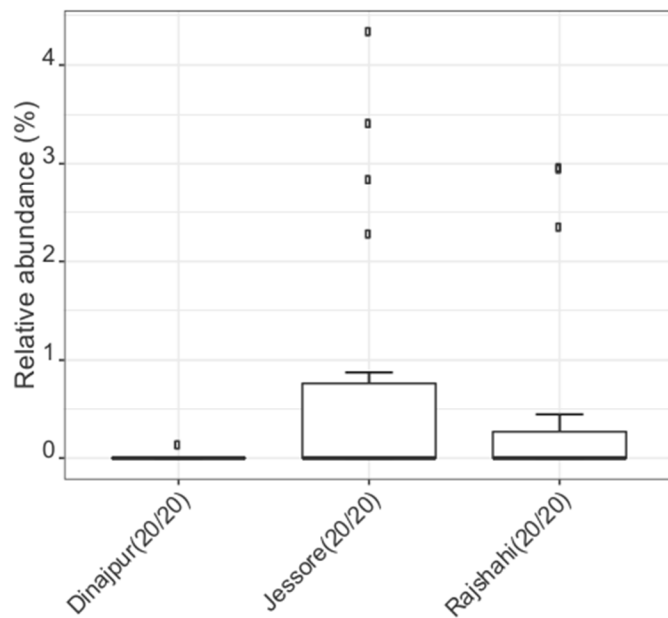

Kruskal-Wallis Rank Sum Test - all groups

|       | p-value | Adj. p-value |
|-------|---------|--------------|
| Otu59 | 0.0128  | 0.0544       |

Wilcoxon Rank Sum Test - pairwise

| Groups | p-value | Adj. p-value |
|--------|---------|--------------|
| 1-2    | 0.0028  | 0.0084       |
| 1-3    | 0.0320  | 0.0480       |

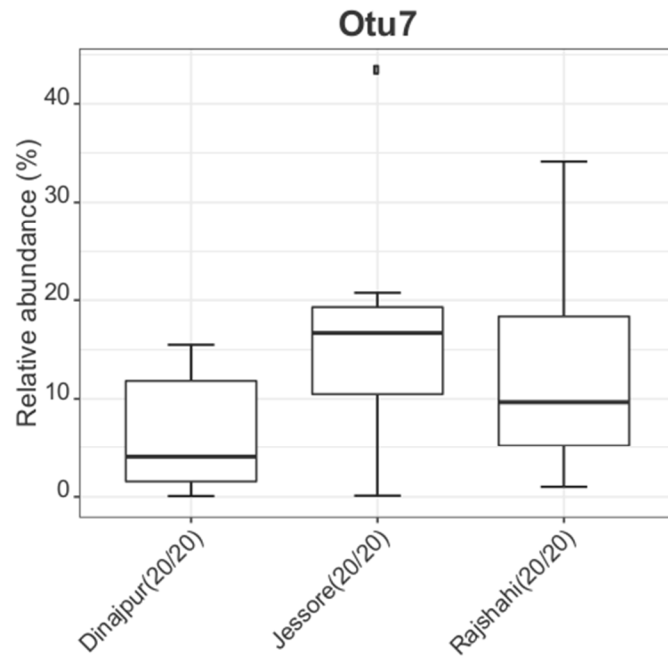

ruskal-Wallis Rank Sum Test - all group

|      | p-value | Adj. p-value |
|------|---------|--------------|
| Otu7 | 0.002   | 0.0146       |

Wilcoxon Rank Sum Test - pairwise

| Groups | p-value | Adj. p-value |
|--------|---------|--------------|
| 1-2    | 0.0004  | 0.0012       |
| 1-3    | 0.0155  | 0.0232       |



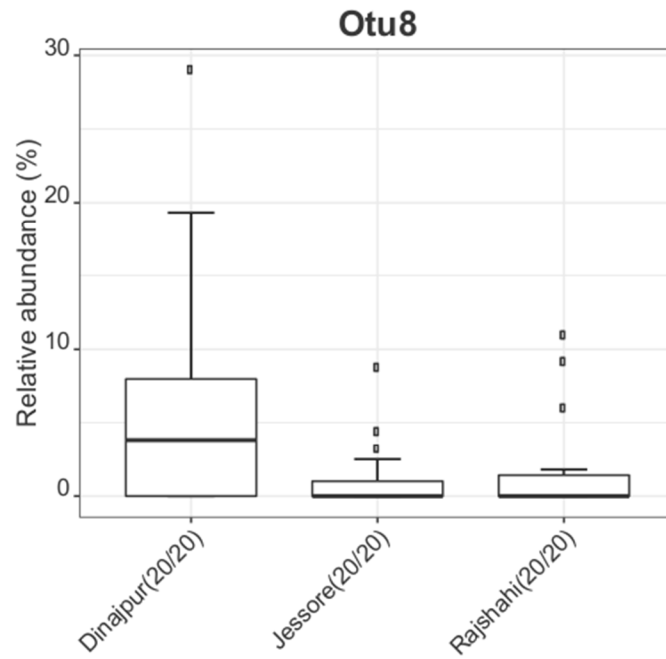

ruskal-Wallis Rank Sum Test - all group

|      | p-value | Adj. p-value |
|------|---------|--------------|
| Otu8 | 0.0046  | 0.024        |

Wilcoxon Rank Sum Test - pairwise

| Groups | p-value | Adj. p-value |
|--------|---------|--------------|
| 1-2    | 0.0044  | 0.0132       |
| 1-3    | 0.0089  | 0.0134       |

**Supplementary Figure S2:** Alpha diversity indices and pairwise comparisons of OTUs that show statistically significant differences ( $p\text{-value} < 0.05$ ) among the three tested areas.

# Dinajpur Network (Genus level)

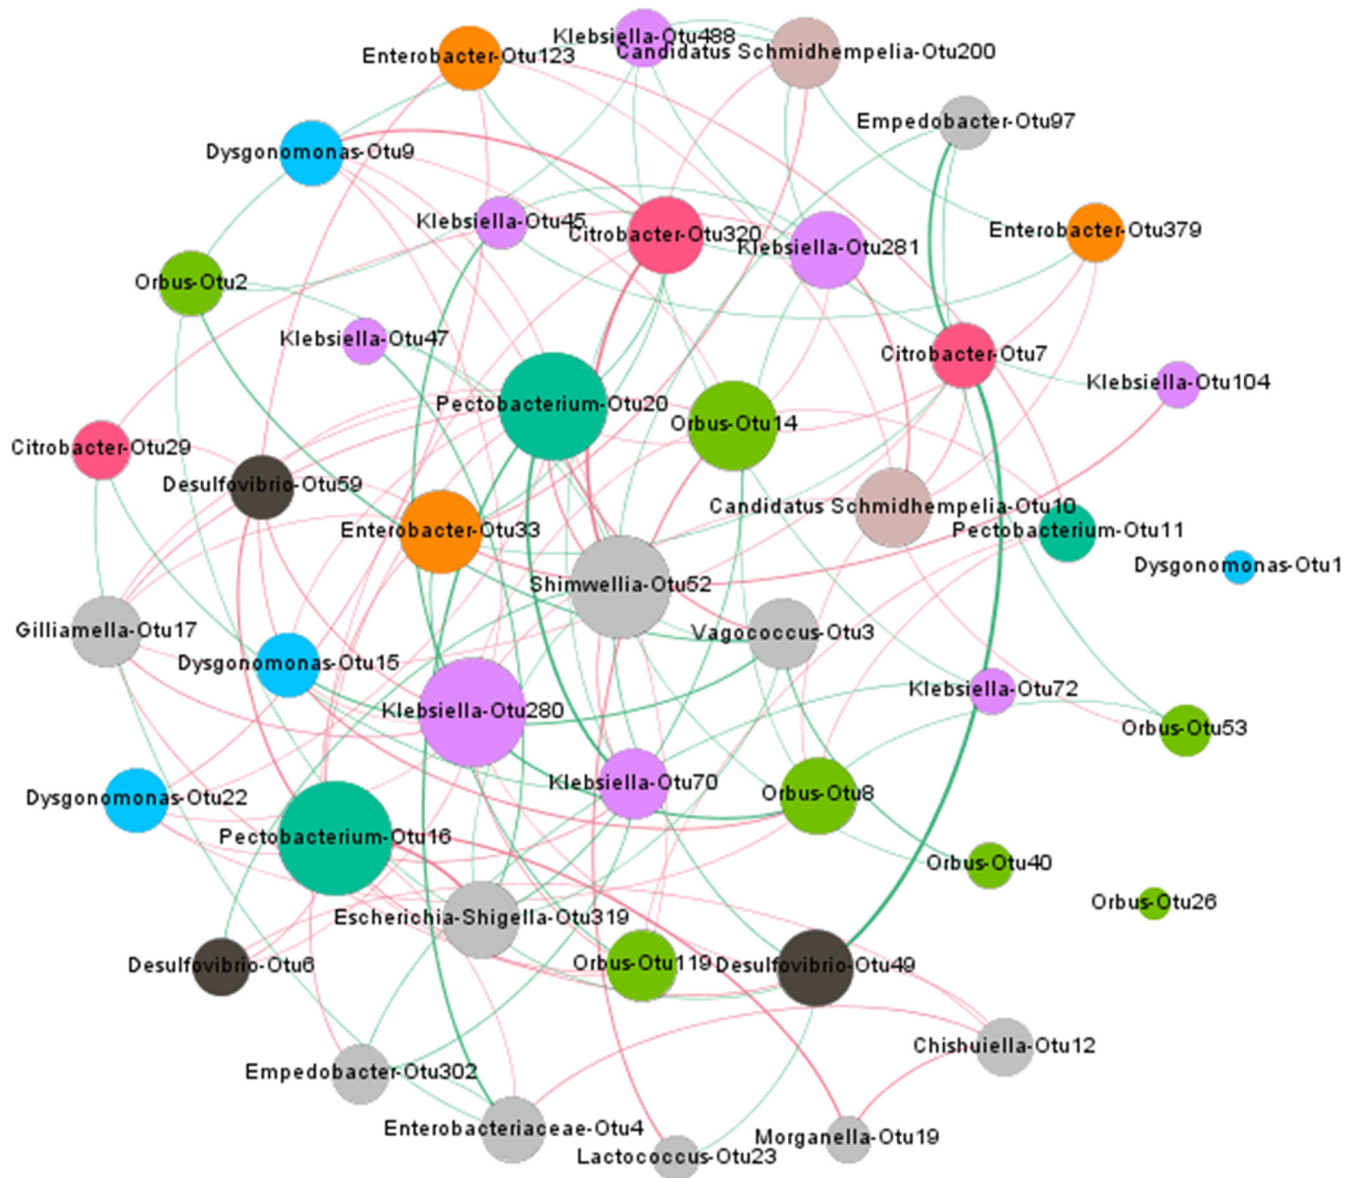

# Jessore Network (Genus level)

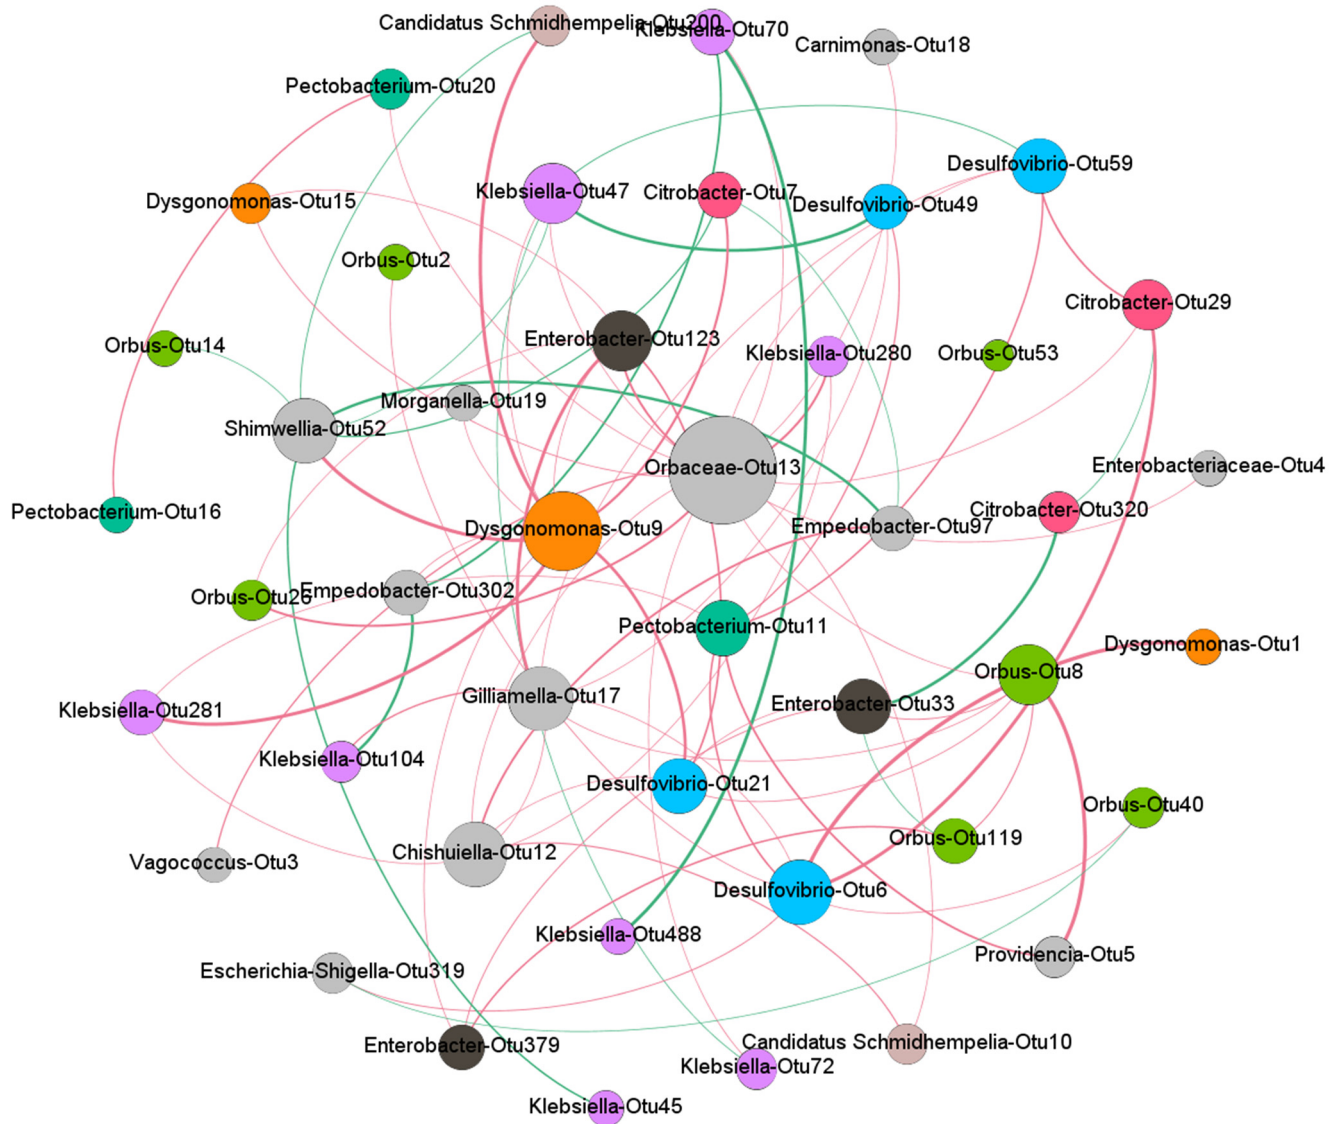

# Rajshahi Network (Genus level)

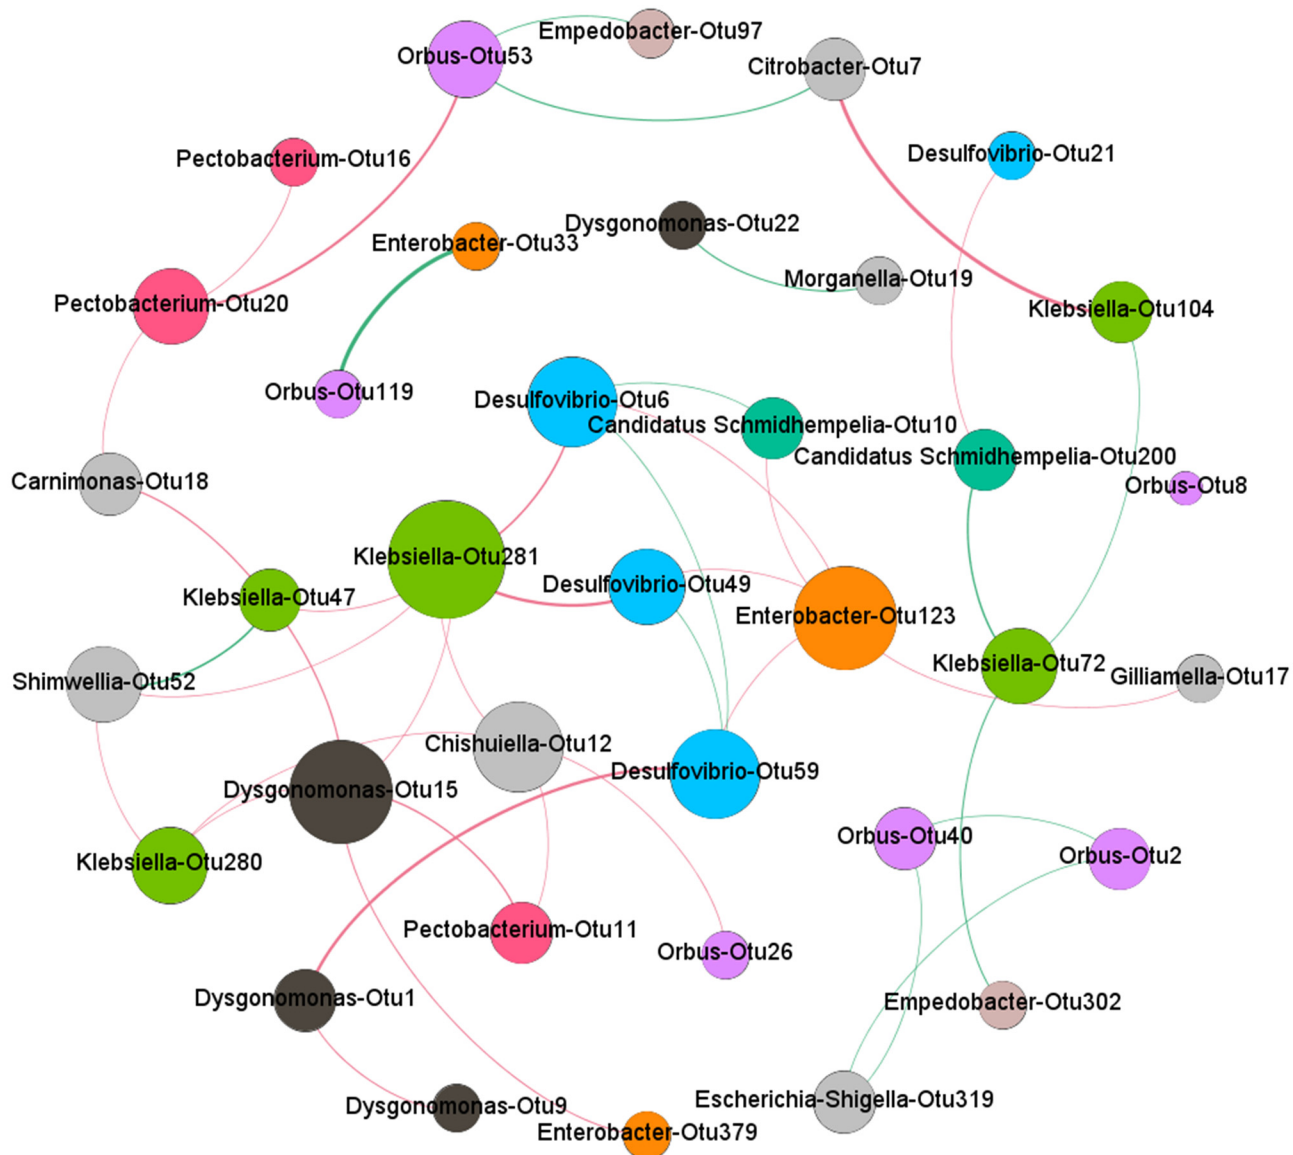

Supplementary Figure S3: Mutual exclusion and co-occurrence networks among OTUs (genera) in the three tested areas.

Supplementary Table S3: Network statistics for each region

|          | Nodes | Edges | Average Clustering Coefficient: | Total triangles | Mutual exclusion % | Copresence % | Mutual exclusion (number of edges) | Copresence (number of edges) |
|----------|-------|-------|---------------------------------|-----------------|--------------------|--------------|------------------------------------|------------------------------|
| Dinajpur | 43    | 113   | 0.205                           | 42              | 59.29              | 40.71        | 67                                 | 46                           |
| Jessore  | 45    | 77    | 0.349                           | 16              | 77.92              | 22.08        | 60                                 | 17                           |
| Rajshahi | 36    | 40    | 0.291                           | 5               | 65                 | 35           | 26                                 | 14                           |

Supplementary Table S4: Network statistics for the OTUs in the three tested areas. The column titled “degree” contains the total number of interactions. The column titled “posdegree” contains the number of positive interactions, and “negdegree” negative interactions.

### Network Statistics Dinajpur

| Label                           | lineage                                                                                                          | posdegree | abundance | degree | negdegree | sample count | clustering | triangles |     |    |
|---------------------------------|------------------------------------------------------------------------------------------------------------------|-----------|-----------|--------|-----------|--------------|------------|-----------|-----|----|
| Pectobacterium-Otu16            | Bacteria_Proteobacteria_Gammaproteobacteria_Enterobacteriales_Enterobacteriaceae_Pectobacterium_OTU_Otu16        | 4         | 0.040     | 962    | 25        | 21           | 5          | 0.153     | 846 | 12 |
| Pectobacterium-Otu20            | Bacteria_Proteobacteria_Gammaproteobacteria_Enterobacteriales_Enterobacteriaceae_Pectobacterium_OTU_Otu20        | 5         | 0.096     | 059    | 24        | 19           | 10         | 0.196     | 97  | 13 |
| Shimwellia-Otu52                | Bacteria_Proteobacteria_Gammaproteobacteria_Enterobacteriales_Enterobacteriaceae_Shimwellia_OTU_Otu52            | 19        | 0.027     | 907    | 22        | 3            | 12         | 0.181     | 818 | 10 |
| Gilliamella-Otu17               | Bacteria_Proteobacteria_Gammaproteobacteria_Orbales_Orbaceae_Gilliamella_OTU_Otu17                               | 5         | 0.004     | 948    | 18        | 13           | 1          | 0.333     | 333 | 5  |
| Escherichia-Shigella-Otu319     | Bacteria_Proteobacteria_Gammaproteobacteria_Enterobacteriales_Enterobacteriaceae_Escherichia-Shigella_OTU_Otu319 | 17        | 0.023     | 458    | 18        | 1            | 18         | 0.285     | 714 | 6  |
| Orbus-Otu14                     | Bacteria_Proteobacteria_Gammaproteobacteria_Orbales_Orbaceae_Orbus_OTU_Otu14                                     | 4         | 0.158     | 718    | 16        | 12           | 7          | 0.111     | 111 | 4  |
| Klebsiella-Otu280               | Bacteria_Proteobacteria_Gammaproteobacteria_Enterobacteriales_Enterobacteriaceae_Klebsiella_OTU_Otu280           | 5         | 0.054     | 844    | 16        | 11           | 8          | 0.106     | 061 | 7  |
| Candidatus Schmidhempelia-Otu10 | Bacteria_Proteobacteria_Gammaproteobacteria_Orbales_Orbaceae_Candidatus Schmidhempelia_OTU_Otu10                 | 3         | 0.242     | 38     | 14        | 11           | 3          | 0.190     | 476 | 4  |
| Citrobacter-Otu320              | Bacteria_Proteobacteria_Gammaproteobacteria_Enterobacteriales_Enterobacteriaceae_Citrobacter_OTU_Otu320          | 7         | 0.050     | 372    | 13        | 6            | 16         | 0.380     | 952 | 8  |
| Desulfovibrio-Otu49             | Bacteria_Proteobacteria_Deltaproteobacteria_Desulfovibrionales_Desulfovibrionaceae_Desulfovibrio_OTU_Otu49       | 9         | 0.005     | 797    | 13        | 4            | 3          | 0.095     | 238 | 2  |

|                         |                                                                                                            |    |     |    |    |    |       |     |
|-------------------------|------------------------------------------------------------------------------------------------------------|----|-----|----|----|----|-------|-----|
| Dysgonomonas-Otu9       | Bacteria_Bacteroidetes_Bacteroidia_Bacteroidales_Dysgonomonadaceae_Dysgonomonas_OTU_Otu9                   | 3  | 678 | 13 | 10 | 2  | 0.4   | 4   |
| Orbus-Otu8              | Bacteria_Proteobacteria_Gammaproteobacteria_Orbales_Orbaceae_Orbus_OTU_Otu8                                | 5  | 702 | 13 | 8  | 14 | 0.238 | 095 |
| Desulfovibrio-Otu59     | Bacteria_Proteobacteria_Deltaproteobacteria_Desulfovibrionales_Desulfovibrionaceae_Desulfovibrio_OTU_Otu59 | 4  | 294 | 13 | 9  | 1  | 0.2   | 2   |
| Orbus-Otu2              | Bacteria_Proteobacteria_Gammaproteobacteria_Orbales_Orbaceae_Orbus_OTU_Otu2                                | 10 | 101 | 12 | 2  | 20 | 0.4   | 4   |
| Orbus-Otu40             | Bacteria_Proteobacteria_Gammaproteobacteria_Orbales_Orbaceae_Orbus_OTU_Otu40                               | 11 | 653 | 11 | 0  | 20 | 1     | 1   |
| Enterobacter-Otu33      | Bacteria_Proteobacteria_Gammaproteobacteria_Enterobacteriales_Enterobacteriaceae_Enterobacter_OTU_Otu33    | 3  | 15  | 11 | 8  | 11 | 0.214 | 286 |
| Dysgonomonas-Otu15      | Bacteria_Bacteroidetes_Bacteroidia_Bacteroidales_Dysgonomonadaceae_Dysgonomonas_OTU_Otu15                  | 6  | 292 | 10 | 4  | 3  | 0.2   | 2   |
| Enterobacter-Otu123     | Bacteria_Proteobacteria_Gammaproteobacteria_Enterobacteriales_Enterobacteriaceae_Enterobacter_OTU_Otu123   | 2  | 358 | 10 | 8  | 15 | 0.1   | 1   |
| Vagococcus-Otu3         | Bacteria_Firmicutes_Bacilli_Lactobacillales_Enterococcaceae_Vagococcus_OTU_Otu3                            | 8  | 56  | 10 | 2  | 20 | 0.4   | 6   |
| Klebsiella-Otu47        | Bacteria_Proteobacteria_Gammaproteobacteria_Enterobacteriales_Enterobacteriaceae_Klebsiella_OTU_Otu47      | 9  | 839 | 9  | 0  | 20 | 1     | 1   |
| Schmidhempelia-Otu200   | Bacteria_Proteobacteria_Gammaproteobacteria_Orbales_Orbaceae_Candidatus_Schmidhempelia_OTU_Otu200          | 5  | 26  | 9  | 4  | 14 | 0.133 | 333 |
| Klebsiella-Otu281       | Bacteria_Proteobacteria_Gammaproteobacteria_Enterobacteriales_Enterobacteriaceae_Klebsiella_OTU_Otu281     | 6  | 047 | 9  | 3  | 6  | 0.095 | 238 |
| Dysgonomonas-Otu22      | Bacteria_Bacteroidetes_Bacteroidia_Bacteroidales_Dysgonomonadaceae_Dysgonomonas_OTU_Otu22                  | 2  | 77  | 9  | 7  | 3  | 0.2   | 2   |
| Enterobacteriaceae-Otu4 | Bacteria_Proteobacteria_Gammaproteobacteria_Enterobacteriales_Enterobacteriaceae_Ambiguous_taxa_OTU_Otu4   | 6  | 522 | 9  | 3  | 20 | 0.2   | 2   |
| Klebsiella-Otu488       | Bacteria_Proteobacteria_Gammaproteobacteria_Enterobacteriales_Enterobacteriaceae_Klebsiella_OTU_Otu488     | 8  | 098 | 8  | 0  | 16 | 0.166 | 667 |
| Klebsiella-Otu70        | Bacteria_Proteobacteria_Gammaproteobacteria_Enterobacteriales_Enterobacteriaceae_Klebsiella_OTU_Otu70      | 6  | 208 | 8  | 2  | 20 | 0.4   | 6   |
| Orbus-Otu119            | Bacteria_Proteobacteria_Gammaproteobacteria_Orbales_Orbaceae_Orbus_OTU_Otu119                              | 1  | 88  | 8  | 7  | 9  | 0.266 | 667 |
| Citrobacter-Otu29       | Bacteria_Proteobacteria_Gammaproteobacteria_Enterobacteriales_Enterobacteriaceae_Citrobacter_OTU_Otu29     | 5  | 57  | 7  | 2  | 11 | 0     | 0   |
| Desulfovibrio-Otu6      | Bacteria_Proteobacteria_Deltaproteobacteria_Desulfovibrionales_Desulfovibrionaceae_Desulfovibrio_OTU_Otu6  | 3  | 721 | 7  | 4  | 2  | 0     | 0   |

|                      |                                                                                                           |   |              |   |   |    |              |   |
|----------------------|-----------------------------------------------------------------------------------------------------------|---|--------------|---|---|----|--------------|---|
| Morganella-Otu19     | Bacteria_Proteobacteria_Gammaproteobacteria_Enterobacteriales_Enterobacteriaceae_Morganella_OTU_Otu19     | 0 | 0.004<br>974 | 7 | 7 | 3  | 0            | 0 |
| Citrobacter-Otu7     | Bacteria_Proteobacteria_Gammaproteobacteria_Enterobacteriales_Enterobacteriaceae_Citrobacter_OTU_Otu7     | 3 | 1.228<br>639 | 6 | 3 | 20 | 0.1          | 1 |
| Enterobacter-Otu379  | Bacteria_Proteobacteria_Gammaproteobacteria_Enterobacteriales_Enterobacteriaceae_Enterobacter_OTU_Otu379  | 3 | 0.052<br>771 | 6 | 3 | 5  | 0            | 0 |
| Chishuiella-Otu12    | Bacteria_Bacteroidetes_Bacteroidia_Flavobacteriales_Weeksellaceae_Chishuiella_OTU_Otu12                   | 0 | 0.166<br>955 | 6 | 6 | 5  | 0            | 0 |
| Pectobacterium-Otu11 | Bacteria_Proteobacteria_Gammaproteobacteria_Enterobacteriales_Enterobacteriaceae_Pectobacterium_OTU_Otu11 | 2 | 0.056<br>274 | 6 | 4 | 3  | 0            | 0 |
| Empedobacter-Otu302  | Bacteria_Bacteroidetes_Bacteroidia_Flavobacteriales_Weeksellaceae_Empedobacter_OTU_Otu302                 | 4 | 0.036<br>775 | 5 | 1 | 19 | 0.333<br>333 | 2 |
| Klebsiella-Otu45     | Bacteria_Proteobacteria_Gammaproteobacteria_Enterobacteriales_Enterobacteriaceae_Klebsiella_OTU_Otu45     | 5 | 0.042<br>986 | 5 | 0 | 20 | 0            | 0 |
| Dysgonomonas-Otu1    | Bacteria_Bacteroidetes_Bacteroidia_Bacteroidales_Dysgonomonadaceae_Dysgonomonas_OTU_Otu1                  | 0 | 7.339<br>884 | 4 | 4 | 20 | 0            | 0 |
| Klebsiella-Otu72     | Bacteria_Proteobacteria_Gammaproteobacteria_Enterobacteriales_Enterobacteriaceae_Klebsiella_OTU_Otu72     | 4 | 0.121<br>892 | 4 | 0 | 9  | 0            | 0 |
| Klebsiella-Otu104    | Bacteria_Proteobacteria_Gammaproteobacteria_Enterobacteriales_Enterobacteriaceae_Klebsiella_OTU_Otu104    | 3 | 0.051<br>64  | 4 | 1 | 19 | 0            | 0 |
| Empedobacter-Otu97   | Bacteria_Bacteroidetes_Bacteroidia_Flavobacteriales_Weeksellaceae_Empedobacter_OTU_Otu97                  | 4 | 0.049<br>557 | 4 | 0 | 19 | 0            | 0 |
| Orbus-Otu53          | Bacteria_Proteobacteria_Gammaproteobacteria_Orbales_Orbaceae_Orbus_OTU_Otu53                              | 2 | 0.066<br>213 | 3 | 1 | 18 | 0.333<br>333 | 1 |
| Lactococcus-Otu23    | Bacteria_Firmicutes_Bacilli_Lactobacillales_Streptococcaceae_Lactococcus_OTU_Otu23                        | 1 | 0.076<br>143 | 2 | 1 | 5  | 0            | 0 |
| Orbus-Otu26          | Bacteria_Proteobacteria_Gammaproteobacteria_Orbales_Orbaceae_Orbus_OTU_Otu26                              | 1 | 0.087<br>969 | 1 | 0 | 4  | 0            | 0 |

### Network Statistics Jessore

| Label             | lineage                                                                                                | posde<br>gree | abund<br>ance | deg<br>ree | negde<br>gree | sample<br>count | clust<br>ering | trian<br>gles |
|-------------------|--------------------------------------------------------------------------------------------------------|---------------|---------------|------------|---------------|-----------------|----------------|---------------|
| Shimwellia-Otu52  | Bacteria_Proteobacteria_Gammaproteobacteria_Enterobacteriales_Enterobacteriaceae_Shimwellia_OTU_Otu52  | 7             | 0.027<br>386  | 10         | 3             | 14              | 0.190<br>476   | 4             |
| Klebsiella-Otu47  | Bacteria_Proteobacteria_Gammaproteobacteria_Enterobacteriales_Enterobacteriaceae_Klebsiella_OTU_Otu47  | 5             | 0.197<br>447  | 8          | 3             | 20              | 0.2            | 3             |
| Klebsiella-Otu488 | Bacteria_Proteobacteria_Gammaproteobacteria_Enterobacteriales_Enterobacteriaceae_Klebsiella_OTU_Otu488 | 4             | 0.037<br>462  | 10         | 6             | 19              | 0              | 0             |

|                                   |                                                                                                                  |   |       |     |    |    |    |       |     |   |
|-----------------------------------|------------------------------------------------------------------------------------------------------------------|---|-------|-----|----|----|----|-------|-----|---|
| Empedobacter-Otu97                | Bacteria_Bacteroidetes_Bacteroidia_Flavobacteriales_Weeksellaceae_Empedobacter_OTU_Otu97                         | 4 | 0.033 | 827 | 7  | 3  | 19 | 0.333 | 333 | 1 |
| Citrobacter-Otu320                | Bacteria_Proteobacteria_Gammaproteobacteria_Enterobacteriales_Enterobacteriaceae_Citrobacter_OTU_Otu320          | 3 | 0.022 | 682 | 9  | 6  | 18 | 0     | 0   | 0 |
| Citrobacter-Otu7                  | Bacteria_Proteobacteria_Gammaproteobacteria_Enterobacteriales_Enterobacteriaceae_Citrobacter_OTU_Otu7            | 3 | 3.230 | 727 | 8  | 5  | 20 | 0.666 | 667 | 2 |
| Desulfovibrio-Otu49<br>Candidatus | Bacteria_Proteobacteria_Deltaproteobacteria_Desulfovibrionales_Desulfovibrionaceae_Desulfovibrio_OTU_Otu49       | 3 | 0.055 | 999 | 6  | 3  | 9  | 0     | 0   | 0 |
| Schmidhempelia-Otu200             | Bacteria_Proteobacteria_Gammaproteobacteria_Orbales_Orbaceae_Candidatus_Schmidhempelia_OTU_Otu200                | 3 | 0.033 | 906 | 6  | 3  | 17 | 1     | 1   | 1 |
| Empedobacter-Otu302               | Bacteria_Bacteroidetes_Bacteroidia_Flavobacteriales_Weeksellaceae_Empedobacter_OTU_Otu302                        | 3 | 0.013 | 494 | 6  | 3  | 19 | 0     | 0   | 0 |
| Klebsiella-Otu45                  | Bacteria_Proteobacteria_Gammaproteobacteria_Enterobacteriales_Enterobacteriaceae_Klebsiella_OTU_Otu45            | 3 | 0.025 | 667 | 5  | 2  | 19 | 0     | 0   | 0 |
| Enterobacter-Otu33                | Bacteria_Proteobacteria_Gammaproteobacteria_Enterobacteriales_Enterobacteriaceae_Enterobacter_OTU_Otu33          | 2 | 0.264 | 489 | 9  | 7  | 11 | 0.3   | 3   | 3 |
| Desulfovibrio-Otu59               | Bacteria_Proteobacteria_Deltaproteobacteria_Desulfovibrionales_Desulfovibrionaceae_Desulfovibrio_OTU_Otu59       | 2 | 0.149 | 779 | 9  | 7  | 9  | 0.2   | 2   | 2 |
| Orbus-Otu40                       | Bacteria_Proteobacteria_Gammaproteobacteria_Orbales_Orbaceae_Orbus_OTU_Otu40                                     | 2 | 0.100 | 807 | 9  | 7  | 19 | 1     | 1   | 1 |
| Klebsiella-Otu70                  | Bacteria_Proteobacteria_Gammaproteobacteria_Enterobacteriales_Enterobacteriaceae_Klebsiella_OTU_Otu70            | 2 | 0.681 | 153 | 8  | 6  | 20 | 0     | 0   | 0 |
| Orbus-Otu14                       | Bacteria_Proteobacteria_Gammaproteobacteria_Orbales_Orbaceae_Orbus_OTU_Otu14                                     | 2 | 0.259 | 174 | 4  | 2  | 13 | 0     | 0   | 0 |
| Desulfovibrio-Otu6                | Bacteria_Proteobacteria_Deltaproteobacteria_Desulfovibrionales_Desulfovibrionaceae_Desulfovibrio_OTU_Otu6        | 1 | 0.988 | 332 | 12 | 11 | 7  | 0.047 | 619 | 1 |
| Orbus-Otu8                        | Bacteria_Proteobacteria_Gammaproteobacteria_Orbales_Orbaceae_Orbus_OTU_Otu8                                      | 1 | 0.219 | 271 | 11 | 10 | 7  | 0.133 | 333 | 2 |
| Orbus-Otu119                      | Bacteria_Proteobacteria_Gammaproteobacteria_Orbales_Orbaceae_Orbus_OTU_Otu119                                    | 1 | 0.030 | 519 | 9  | 8  | 14 | 0.666 | 667 | 2 |
| Enterobacter-Otu123               | Bacteria_Proteobacteria_Gammaproteobacteria_Enterobacteriales_Enterobacteriaceae_Enterobacter_OTU_Otu123         | 1 | 0.010 | 486 | 9  | 8  | 6  | 0.2   | 3   | 3 |
| Citrobacter-Otu29                 | Bacteria_Proteobacteria_Gammaproteobacteria_Enterobacteriales_Enterobacteriaceae_Citrobacter_OTU_Otu29           | 1 | 0.476 | 239 | 9  | 8  | 11 | 0.166 | 667 | 1 |
| Escherichia-Shigella-Otu319       | Bacteria_Proteobacteria_Gammaproteobacteria_Enterobacteriales_Enterobacteriaceae_Escherichia-Shigella_OTU_Otu319 | 1 | 0.026 | 777 | 8  | 7  | 19 | 1     | 1   | 1 |
| Klebsiella-Otu72                  | Bacteria_Proteobacteria_Gammaproteobacteria_Enterobacteriales_Enterobacteriaceae_Klebsiella_OTU_Otu72            | 1 | 0.208 | 961 | 6  | 5  | 9  | 1     | 1   | 1 |



|                         |                                                                                                            |   |       |     |    |    |    |     |   |
|-------------------------|------------------------------------------------------------------------------------------------------------|---|-------|-----|----|----|----|-----|---|
| Klebsiella-Otu280       | Bacteria_Proteobacteria_Gammaproteobacteria_Enterobacteriales_Enterobacteriaceae_Klebsiella_OTU_Otu280     | 1 | 0.056 | 576 | 5  | 4  | 8  | 1   | 1 |
| Klebsiella-Otu104       | Bacteria_Proteobacteria_Gammaproteobacteria_Enterobacteriales_Enterobacteriaceae_Klebsiella_OTU_Otu104     | 1 | 0.028 | 552 | 5  | 4  | 19 | 0   | 0 |
| Klebsiella-Otu281       | Bacteria_Proteobacteria_Gammaproteobacteria_Enterobacteriales_Enterobacteriaceae_Klebsiella_OTU_Otu281     | 1 | 0.014 | 631 | 5  | 4  | 5  | 0   | 0 |
| Carnimonas-Otu18        | Bacteria_Proteobacteria_Gammaproteobacteria_Oceanospirillales_Halomonadaceae_Carnimonas_OTU_Otu18          | 1 | 0.091 | 166 | 3  | 2  | 17 | 0   | 0 |
| Orbaceae-Otu13          | Bacteria_Proteobacteria_Gammaproteobacteria_Orbales_Orbaceae_uncultured_OTU_Otu13                          | 0 | 0.598 | 334 | 63 | 63 | 1  | 333 | 7 |
| Dysgonomonas-Otu9       | Bacteria_Bacteroidetes_Bacteroidia_Bacteroidales_Dysgonomonadaceae_Dysgonomonas_OTU_Otu9                   | 0 | 0.116 | 194 | 18 | 18 | 4  | 889 | 4 |
| Gilliamella-Otu17       | Bacteria_Proteobacteria_Gammaproteobacteria_Orbales_Orbaceae_Gilliamella_OTU_Otu17                         | 0 | 0.018 | 955 | 14 | 14 | 1  | 0   | 0 |
| Pectobacterium-Otu11    | Bacteria_Proteobacteria_Gammaproteobacteria_Enterobacteriales_Enterobacteriaceae_Pectobacterium_OTU_Otu11  | 0 | 0.370 | 333 | 12 | 12 | 9  | 0   | 0 |
| Chishuiella-Otu12       | Bacteria_Bacteroidetes_Bacteroidia_Flavobacteriales_Weeksellaceae_Chishuiella_OTU_Otu12                    | 0 | 0.289 | 127 | 10 | 10 | 8  | 238 | 2 |
| Orbus-Otu2              | Bacteria_Proteobacteria_Gammaproteobacteria_Orbales_Orbaceae_Orbus_OTU_Otu2                                | 0 | 3.153 | 511 | 7  | 7  | 20 | 0   | 0 |
| Desulfovibrio-Otu21     | Bacteria_Proteobacteria_Deltaproteobacteria_Desulfovibrionales_Desulfovibrionaceae_Desulfovibrio_OTU_Otu21 | 0 | 0.022 | 386 | 6  | 6  | 3  | 0.2 | 2 |
| Pectobacterium-Otu16    | Bacteria_Proteobacteria_Gammaproteobacteria_Enterobacteriales_Enterobacteriaceae_Pectobacterium_OTU_Otu16  | 0 | 0.117 | 172 | 5  | 5  | 9  | 0   | 0 |
| Schmidhempelia-Otu10    | Bacteria_Proteobacteria_Gammaproteobacteria_Orbales_Orbaceae_Candidatus_Schmidhempelia_OTU_Otu10           | 0 | 0.313 | 039 | 4  | 4  | 6  | 1   | 1 |
| Dysgonomonas-Otu1       | Bacteria_Bacteroidetes_Bacteroidia_Bacteroidales_Dysgonomonadaceae_Dysgonomonas_OTU_Otu1                   | 0 | 3.773 | 732 | 4  | 4  | 20 | 0   | 0 |
| Dysgonomonas-Otu15      | Bacteria_Bacteroidetes_Bacteroidia_Bacteroidales_Dysgonomonadaceae_Dysgonomonas_OTU_Otu15                  | 0 | 0.024 | 452 | 3  | 3  | 5  | 1   | 1 |
| Pectobacterium-Otu20    | Bacteria_Proteobacteria_Gammaproteobacteria_Enterobacteriales_Enterobacteriaceae_Pectobacterium_OTU_Otu20  | 0 | 0.076 | 783 | 3  | 3  | 7  | 0   | 0 |
| Orbus-Otu26             | Bacteria_Proteobacteria_Gammaproteobacteria_Orbales_Orbaceae_Orbus_OTU_Otu26                               | 0 | 0.307 | 945 | 3  | 3  | 6  | 1   | 1 |
| Enterobacter-Otu379     | Bacteria_Proteobacteria_Gammaproteobacteria_Enterobacteriales_Enterobacteriaceae_Enterobacter_OTU_Otu379   | 0 | 0.156 | 713 | 3  | 3  | 8  | 333 | 1 |
| Enterobacteriaceae-Otu4 | Bacteria_Proteobacteria_Gammaproteobacteria_Enterobacteriales_Enterobacteriaceae_Ambiguous_taxa_OTU_Otu4   | 0 | 2.409 | 793 | 2  | 2  | 20 | 0   | 0 |

|                  |                                                                                                       |   |       |     |   |   |    |   |   |
|------------------|-------------------------------------------------------------------------------------------------------|---|-------|-----|---|---|----|---|---|
| Orbus-Otu53      | Bacteria_Proteobacteria_Gammaproteobacteria_Orbales_Orbaceae_Orbus_OTU_Otu53                          | 0 | 0.034 | 385 | 2 | 2 | 19 | 0 | 0 |
| Vagococcus-Otu3  | Bacteria_Firmicutes_Bacilli_Lactobacillales_Enterococcaceae_Vagococcus_OTU_Otu3                       | 0 | 0.534 | 421 | 2 | 2 | 20 | 0 | 0 |
| Providencia-Otu5 | Bacteria_Proteobacteria_Gammaproteobacteria_Enterobacteriales_Enterobacteriaceae_Providencia_OTU_Otu5 | 0 | 0.363 | 557 | 2 | 2 | 20 | 0 | 0 |
| Morganella-Otu19 | Bacteria_Proteobacteria_Gammaproteobacteria_Enterobacteriales_Enterobacteriaceae_Morganella_OTU_Otu19 | 0 | 0.010 | 446 | 1 | 1 | 5  | 0 | 0 |

## Network statistics Rajshahi

| Label                | lineage                                                                                                    | posde gree | abund ance | deg ree | negde gree | sample count | clust ering | trian gles |
|----------------------|------------------------------------------------------------------------------------------------------------|------------|------------|---------|------------|--------------|-------------|------------|
| Klebsiella-Otu281    | Bacteria_Proteobacteria_Gammaproteobacteria_Enterobacteriales_Enterobacteriaceae_Klebsiella_OTU_Otu281     | 1          | 0.010      | 356     | 15         | 14           | 2           | 0.066      |
| Enterobacter-Otu123  | Bacteria_Proteobacteria_Gammaproteobacteria_Enterobacteriales_Enterobacteriaceae_Enterobacter_OTU_Otu123   | 1          | 0.014      | 141     | 12         | 11           | 5           | 0.3        |
| Klebsiella-Otu280    | Bacteria_Proteobacteria_Gammaproteobacteria_Enterobacteriales_Enterobacteriaceae_Klebsiella_OTU_Otu280     | 2          | 0.016      | 626     | 11         | 9            | 3           | 0          |
| Dysgonomonas-Otu15   | Bacteria_Bacteroidetes_Bacteroidia_Bacteroidales_Dysgonomonadaceae_Dysgonomonas_OTU_Otu15                  | 0          | 0.285      | 576     | 10         | 10           | 9           | 0          |
| Schmidhempelia-Otu10 | Bacteria_Proteobacteria_Gammaproteobacteria_Orbales_Orbaceae_Candidatus_Schmidhempelia_OTU_Otu10           | 7          | 0.215      | 617     | 8          | 1            | 5           | 1          |
| Pectobacterium-Otu20 | Bacteria_Proteobacteria_Gammaproteobacteria_Enterobacteriales_Enterobacteriaceae_Pectobacterium_OTU_Otu20  | 0          | 0.050      | 822     | 6          | 6            | 6           | 0          |
| Pectobacterium-Otu11 | Bacteria_Proteobacteria_Gammaproteobacteria_Enterobacteriales_Enterobacteriaceae_Pectobacterium_OTU_Otu11  | 1          | 0.203      | 267     | 6          | 5            | 9           | 0          |
| Desulfovibrio-Otu6   | Bacteria_Proteobacteria_Deltaproteobacteria_Desulfovibrionales_Desulfovibrionaceae_Desulfovibrio_OTU_Otu6  | 4          | 0.399      | 193     | 6          | 2            | 7           | 0.333      |
| Desulfovibrio-Otu59  | Bacteria_Proteobacteria_Deltaproteobacteria_Desulfovibrionales_Desulfovibrionaceae_Desulfovibrio_OTU_Otu59 | 3          | 0.093      | 074     | 5          | 2            | 6           | 0.333      |
| Dysgonomonas-Otu1    | Bacteria_Bacteroidetes_Bacteroidia_Bacteroidales_Dysgonomonadaceae_Dysgonomonas_OTU_Otu1                   | 0          | 4.080      | 75      | 4          | 4            | 20          | 0          |
| Orbus-Otu26          | Bacteria_Proteobacteria_Gammaproteobacteria_Orbales_Orbaceae_Orbus_OTU_Otu26                               | 0          | 0.354      | 554     | 4          | 4            | 7           | 0          |
| Chishuiella-Otu12    | Bacteria_Bacteroidetes_Bacteroidia_Flavobacteriales_Weeksellaceae_Chishuiella_OTU_Otu12                    | 0          | 0.194      | 903     | 4          | 4            | 9           | 0          |
| Klebsiella-Otu47     | Bacteria_Proteobacteria_Gammaproteobacteria_Enterobacteriales_Enterobacteriaceae_Klebsiella_OTU_Otu47      | 3          | 0.182      | 394     | 4          | 1            | 20          | 1          |

|                                |                                                                                                                  |   |       |     |   |   |    |     |   |
|--------------------------------|------------------------------------------------------------------------------------------------------------------|---|-------|-----|---|---|----|-----|---|
| Klebsiella-Otu72               | Bacteria_Proteobacteria_Gammaproteobacteria_Enterobacteriales_Enterobacteriaceae_Klebsiella_OTU_Otu72            | 4 | 0.390 | 258 | 4 | 0 | 12 | 0   | 0 |
| Desulfovibrio-Otu49            | Bacteria_Proteobacteria_Deltaproteobacteria_Desulfovibrionales_Desulfovibrionaceae_Desulfovibrio_OTU_Otu49       | 2 | 0.030 | 46  | 4 | 2 | 7  | 333 | 1 |
| Orbus-Otu2                     | Bacteria_Proteobacteria_Gammaproteobacteria_Orbales_Orbaceae_Orbus_OTU_Otu2                                      | 3 | 2.083 | 745 | 3 | 0 | 20 | 1   | 1 |
| Orbus-Otu40                    | Bacteria_Proteobacteria_Gammaproteobacteria_Orbales_Orbaceae_Orbus_OTU_Otu40                                     | 3 | 0.073 | 534 | 3 | 0 | 20 | 1   | 1 |
| Orbus-Otu53                    | Bacteria_Proteobacteria_Gammaproteobacteria_Orbales_Orbaceae_Orbus_OTU_Otu53                                     | 2 | 0.022 | 531 | 3 | 1 | 19 | 0   | 0 |
| Gilliamella-Otu17              | Bacteria_Proteobacteria_Gammaproteobacteria_Orbales_Orbaceae_Gilliamella_OTU_Otu17                               | 2 | 0.088 | 822 | 3 | 1 | 6  | 0   | 0 |
| Shimwellia-Otu52               | Bacteria_Proteobacteria_Gammaproteobacteria_Enterobacteriales_Enterobacteriaceae_Shimwellia_OTU_Otu52            | 1 | 0.019 | 658 | 3 | 2 | 13 | 333 | 1 |
| Dysgonomonas-Otu9              | Bacteria_Bacteroidetes_Bacteroidia_Bacteroidales_Dysgonomonadaceae_Dysgonomonas_OTU_Otu9                         | 0 | 0.643 | 218 | 2 | 2 | 6  | 0   | 0 |
| Klebsiella-Otu104              | Bacteria_Proteobacteria_Gammaproteobacteria_Enterobacteriales_Enterobacteriaceae_Klebsiella_OTU_Otu104           | 1 | 0.035 | 231 | 2 | 1 | 20 | 0   | 0 |
| Escherichia-Shigella-Otu319    | Bacteria_Proteobacteria_Gammaproteobacteria_Enterobacteriales_Enterobacteriaceae_Escherichia-Shigella_OTU_Otu319 | 2 | 0.015 | 398 | 2 | 0 | 18 | 1   | 1 |
| Carnimonas-Otu18               | Bacteria_Proteobacteria_Gammaproteobacteria_Oceanospirillales_Halomonadaceae_Carnimonas_OTU_Otu18                | 0 | 0.007 | 168 | 2 | 2 | 7  | 0   | 0 |
| Citrobacter-Otu7<br>Candidatus | Bacteria_Proteobacteria_Gammaproteobacteria_Enterobacteriales_Enterobacteriaceae_Citrobacter_OTU_Otu7            | 1 | 2.541 | 151 | 2 | 1 | 20 | 0   | 0 |
| Schmidhempelia-Otu200          | Bacteria_Proteobacteria_Gammaproteobacteria_Orbales_Orbaceae_Candidatus_Schmidhempelia_OTU_Otu200                | 1 | 0.014 | 932 | 2 | 1 | 9  | 0   | 0 |
| Dysgonomonas-Otu22             | Bacteria_Bacteroidetes_Bacteroidia_Bacteroidales_Dysgonomonadaceae_Dysgonomonas_OTU_Otu22                        | 2 | 0.036 | 759 | 2 | 0 | 4  | 0   | 0 |
| Desulfovibrio-Otu21            | Bacteria_Proteobacteria_Deltaproteobacteria_Desulfovibrionales_Desulfovibrionaceae_Desulfovibrio_OTU_Otu21       | 1 | 0.022 | 862 | 2 | 1 | 3  | 0   | 0 |
| Orbus-Otu8                     | Bacteria_Proteobacteria_Gammaproteobacteria_Orbales_Orbaceae_Orbus_OTU_Otu8                                      | 1 | 0.308 | 696 | 2 | 1 | 6  | 0   | 0 |
| Pectobacterium-Otu16           | Bacteria_Proteobacteria_Gammaproteobacteria_Enterobacteriales_Enterobacteriaceae_Pectobacterium_OTU_Otu16        | 0 | 0.167 | 403 | 1 | 1 | 6  | 0   | 0 |
| Enterobacter-Otu33             | Bacteria_Proteobacteria_Gammaproteobacteria_Enterobacteriales_Enterobacteriaceae_Enterobacter_OTU_Otu33          | 1 | 0.380 | 868 | 1 | 0 | 15 | 0   | 0 |
| Orbus-Otu119                   | Bacteria_Proteobacteria_Gammaproteobacteria_Orbales_Orbaceae_Orbus_OTU_Otu119                                    | 1 | 0.046 | 867 | 1 | 0 | 16 | 0   | 0 |

|                     |                                                                                                          |   |       |     |   |   |    |   |   |
|---------------------|----------------------------------------------------------------------------------------------------------|---|-------|-----|---|---|----|---|---|
| Empedobacter-Otu302 | Bacteria_Bacteroidetes_Bacteroidia_Flavobacteriales_Weeksellaceae_Empedobacter_OTU_Otu302                | 1 | 0.016 | 27  | 1 | 0 | 19 | 0 | 0 |
| Empedobacter-Otu97  | Bacteria_Bacteroidetes_Bacteroidia_Flavobacteriales_Weeksellaceae_Empedobacter_OTU_Otu97                 | 1 | 0.023 | 464 | 1 | 0 | 19 | 0 | 0 |
| Morganella-Otu19    | Bacteria_Proteobacteria_Gammaproteobacteria_Enterobacteriales_Enterobacteriaceae_Morganella_OTU_Otu19    | 1 | 0.103 | 113 | 1 | 0 | 5  | 0 | 0 |
| Enterobacter-Otu379 | Bacteria_Proteobacteria_Gammaproteobacteria_Enterobacteriales_Enterobacteriaceae_Enterobacter_OTU_Otu379 | 0 | 0.022 | 227 | 1 | 1 | 2  | 0 | 0 |
